# Supplementary material
Source: PubMed Central journal article supplement (PMC5414917)
Supplement: rsif20170158supp1.pdf [file rsif20170158supp1.pdf]

# Engineering associative learning in multicellular microbial consortia

## Supplementary Information

Javier Macia<sup>1,2</sup>, Blai Vidiella<sup>1,2</sup>, Ricard Solé<sup>1,2,3,\*</sup>

1. ICREA-Complex Systems Lab, Department of Experimental and Health Sciences, Universitat Pompeu Fabra, Dr. Aiguader 88, 08003 Barcelona, Spain

2. Institut de Biologia Evolutiva (CSIC-Universitat Pompeu Fabra), Passeig Maritim de la Barceloneta 37, 08003 Barcelona, Spain

3. Santa Fe Institute, 1399 Hyde Park Road, Santa Fe, NM 87501, USA

\* corresponding author

### Contents

|                                                                                                   |    |
|---------------------------------------------------------------------------------------------------|----|
| <b>1. Isolated cells time series</b>                                                              | 2  |
| <b>2. Phase space Associative learning (via Toggle-Switch) depending on <math>\gamma_A</math></b> | 4  |
| <b>3. Whole species spaces</b>                                                                    | 5  |
| <b>4. Model description of Associative Learning (positive feedback loop)</b>                      | 9  |
| <b>5. Model description of Damped Learning alternatives</b>                                       | 10 |
| First design                                                                                      | 10 |
| Second design                                                                                     | 11 |

# 1. ISOLATED CELLS TIME SERIES

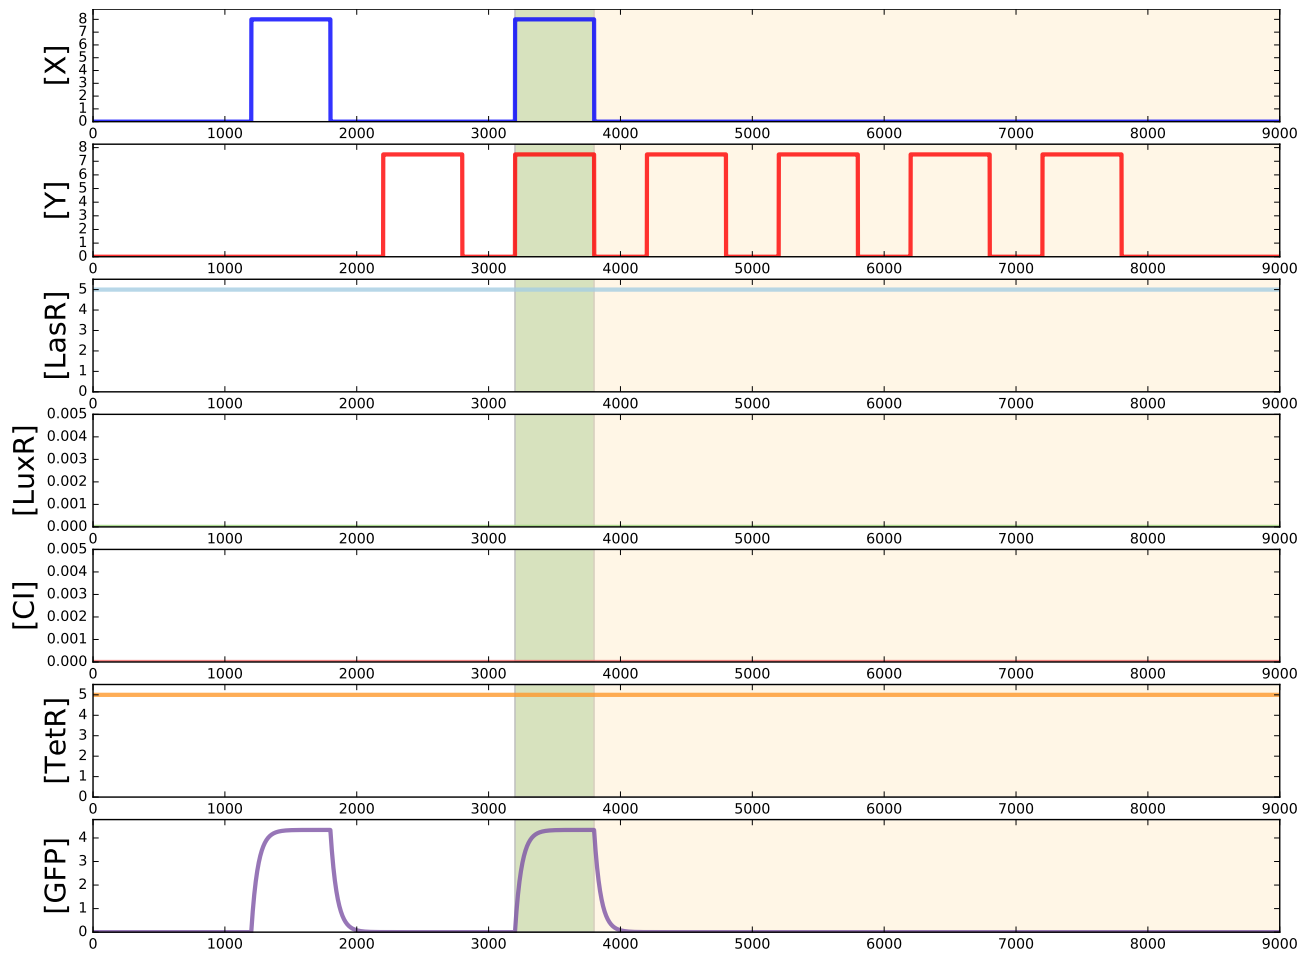

FIG. 1: Producer cell dynamics under the learning stimulation. The parameter used for this simulation are the same used for the Fig.2 in the main text.

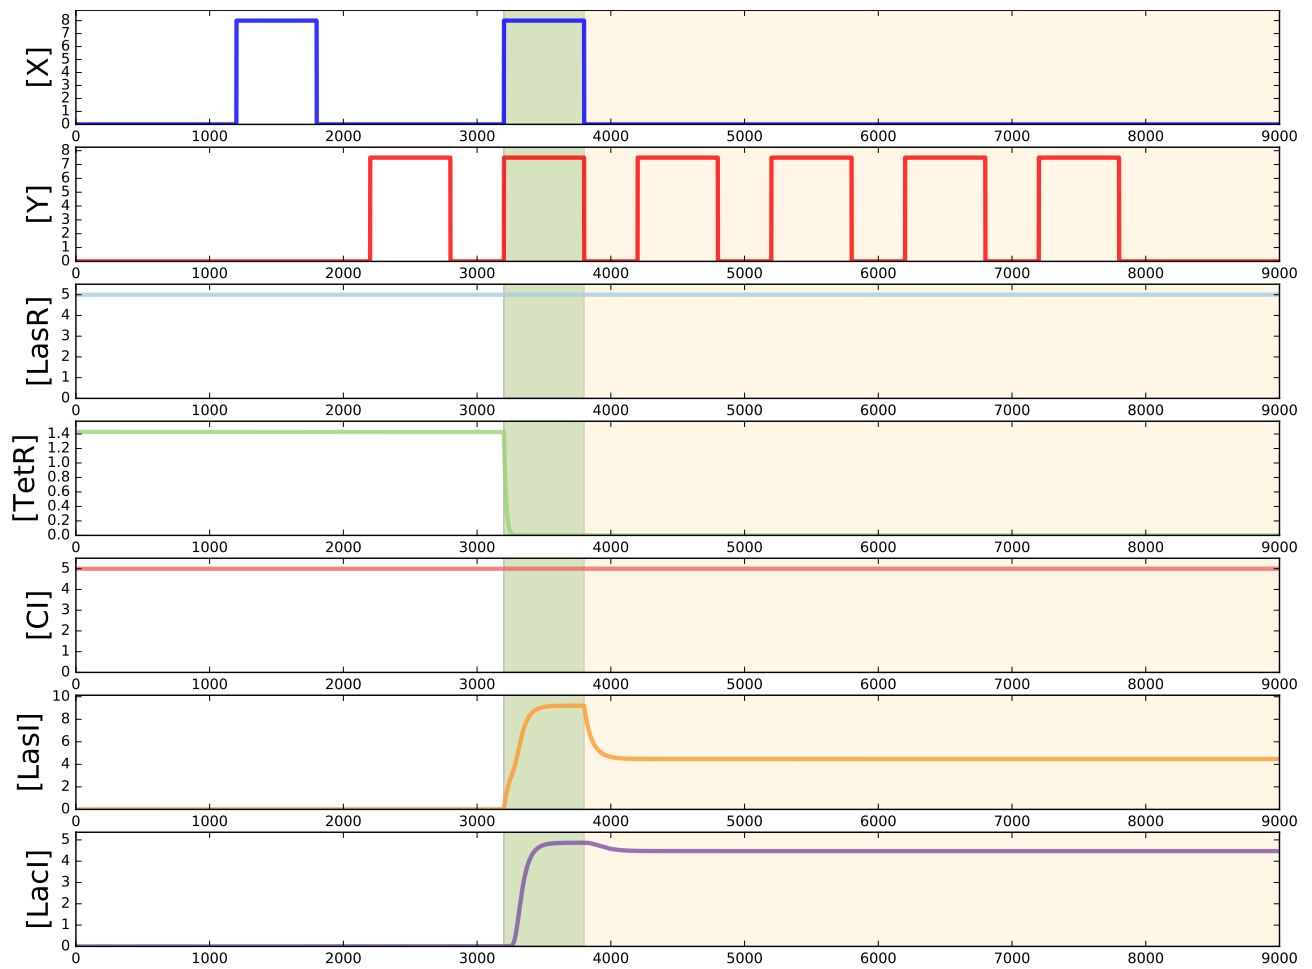

FIG. 2: Learning cell dynamics under the learning stimulation. The parameter used for this simulation are the same used for the previous figures.

## 2. PHASE SPACE ASSOCIATIVE LEARNING (VIA TOGGLE-SWITCH) DEPENDING ON $\gamma_A$

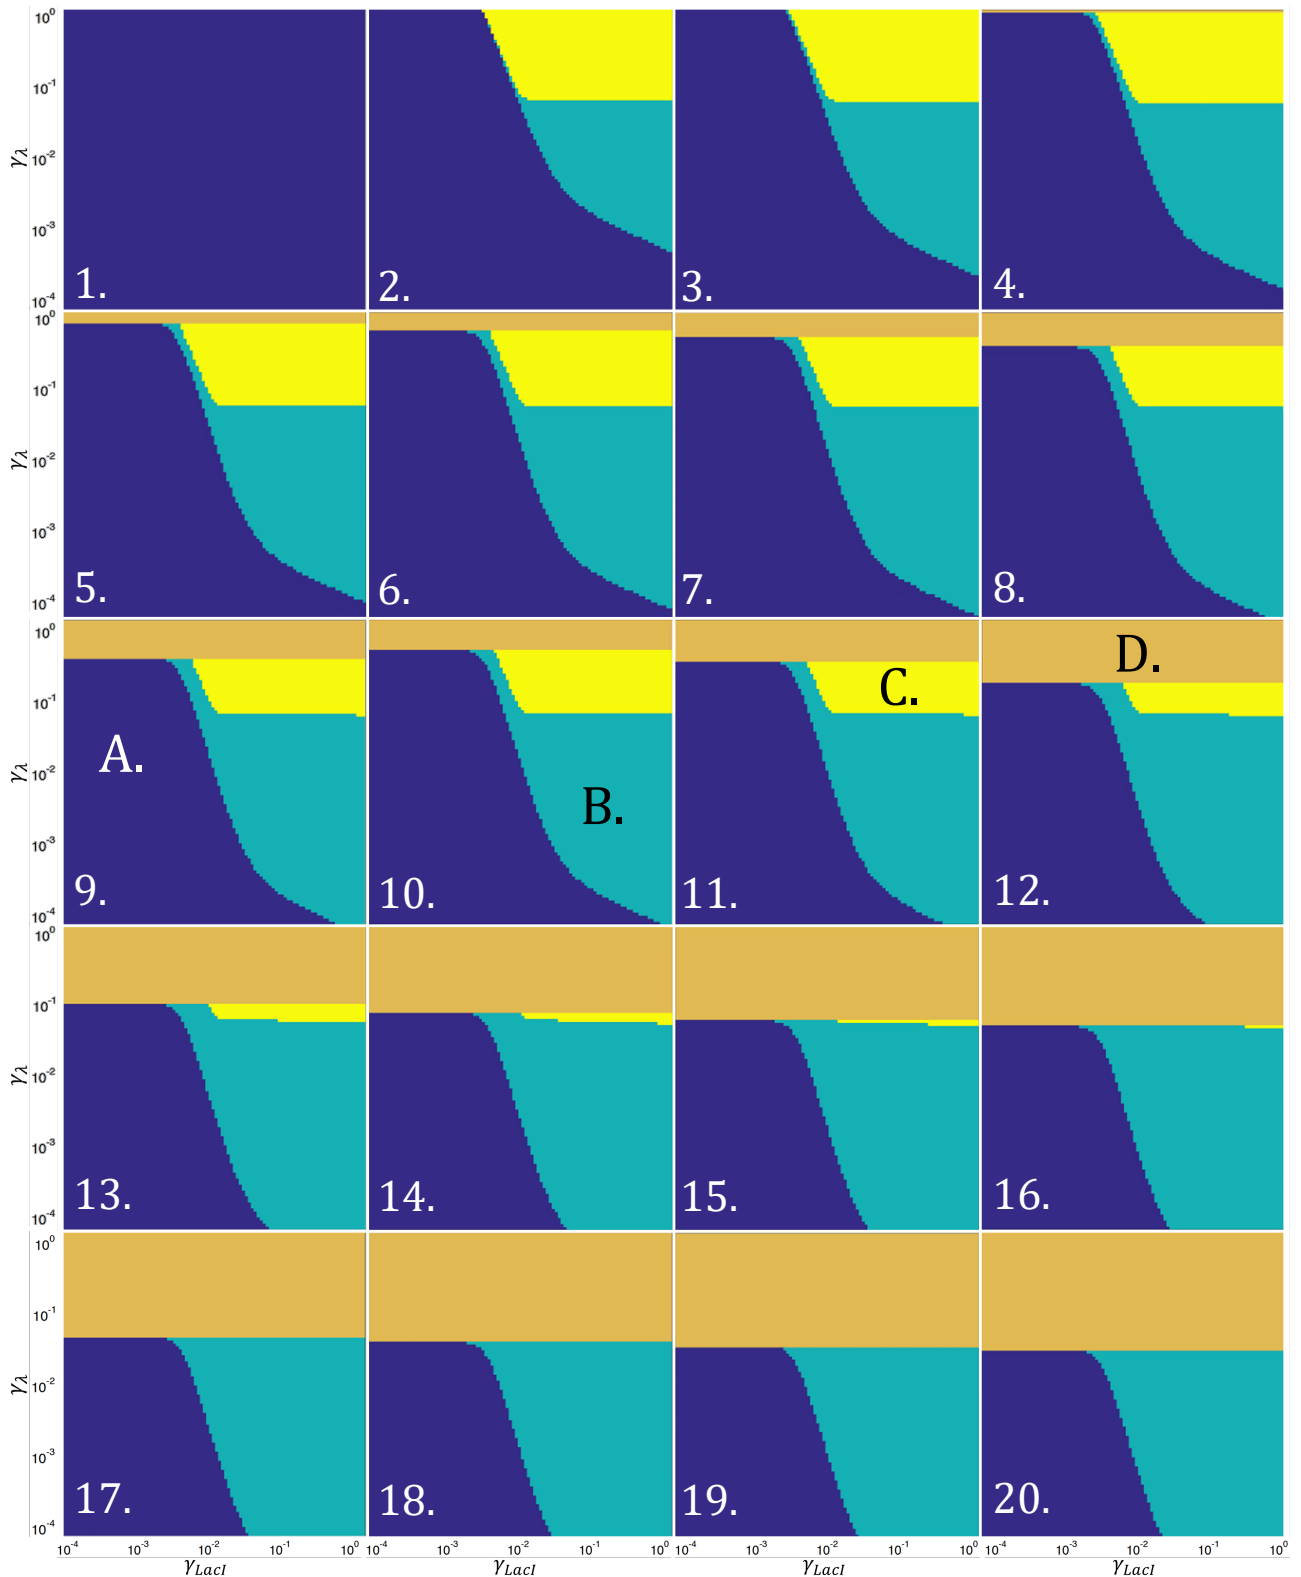

FIG. 3: Phase space depending on  $\gamma_A$ . From 1. to 11. the values of  $\gamma_A$  are from 0 to 0.1 with an increment of 0.01. The rest of phase spaces (11.-20.) the increment is 0.1, then the production rate at the phase space 20. is 1. The other parameters are the same as the previous figures; the supplementary phase spaces are done using a regular 100x100 lattice.

### 3. WHOLE SPECIES SPACES

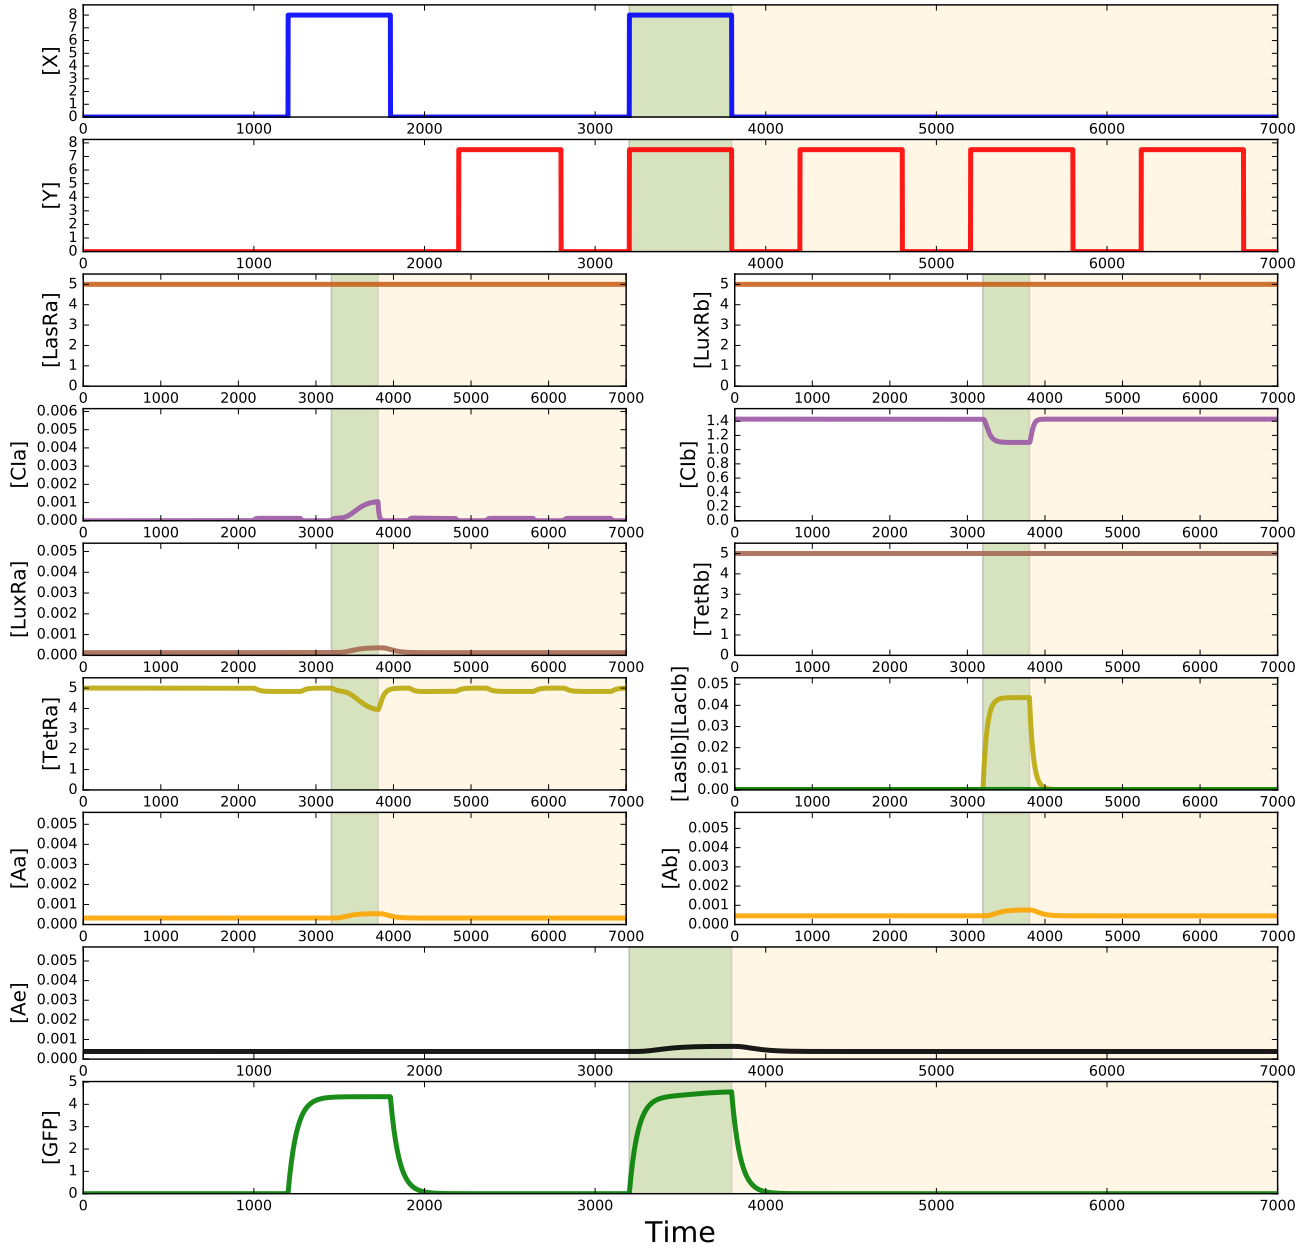

FIG. 4: No Learning. The GFP signal shows that the systems responds to the non-conditioned signal  $X$ . The parameter values are  $\gamma_{LacI} = 10^{-3}$  and  $\gamma_{\lambda} = 10^{-1}$ ; the other parameters are fixed to the same used in the previous figures.

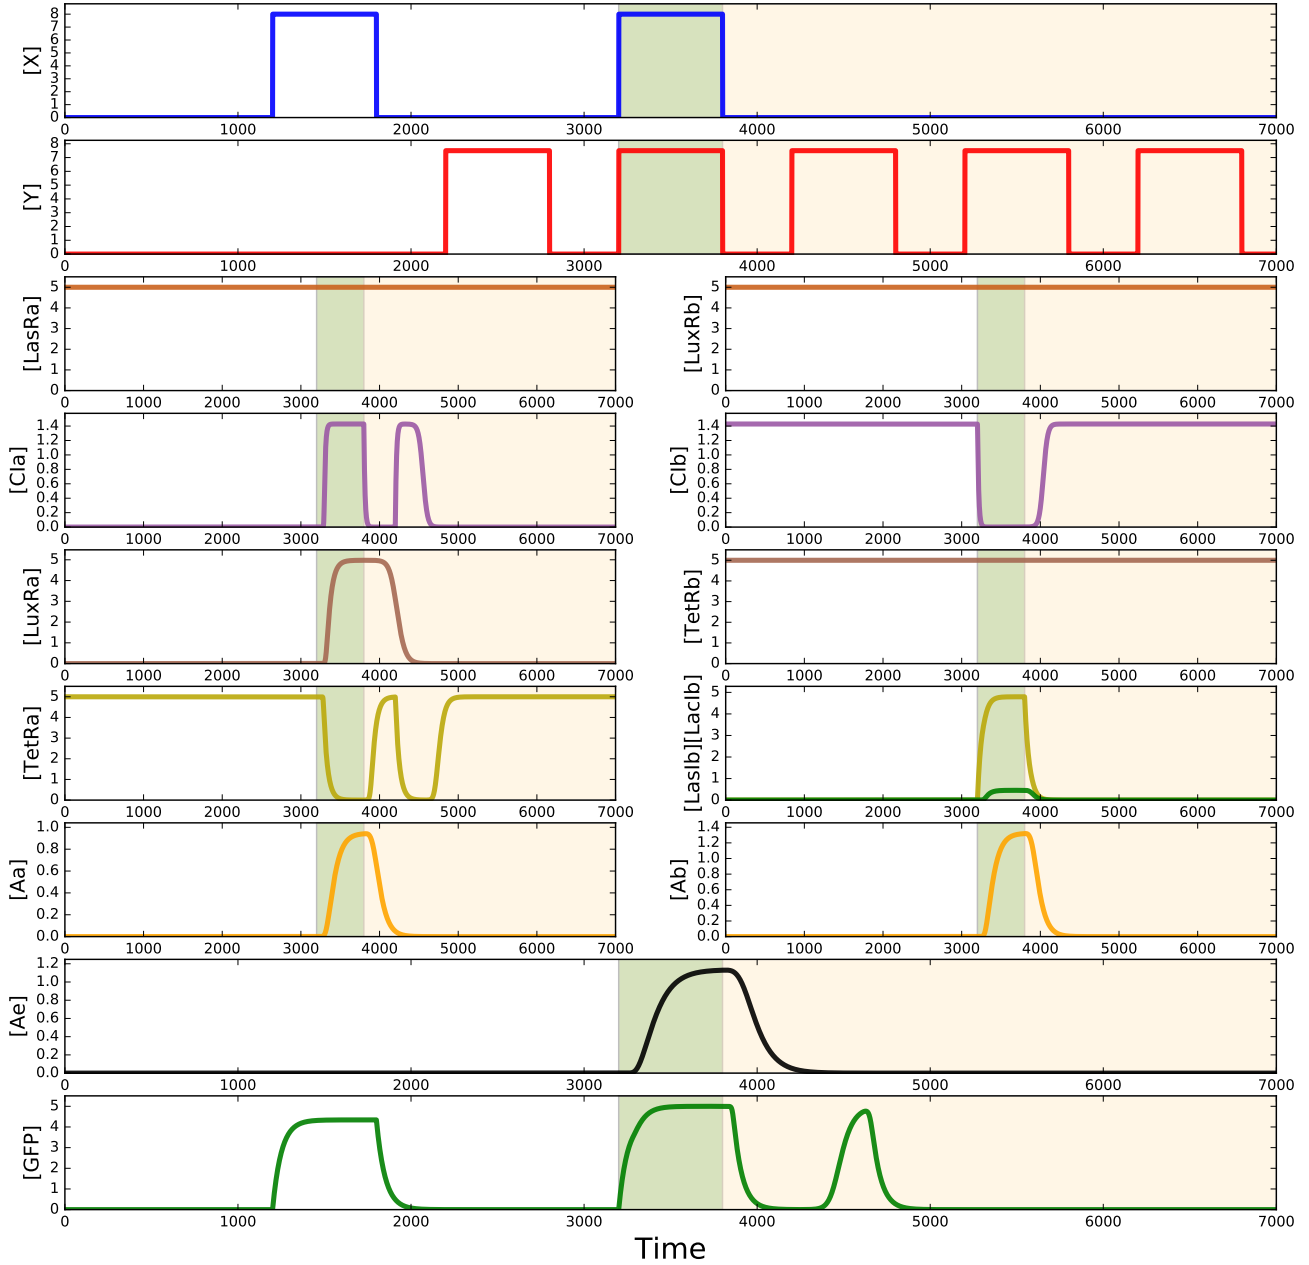

FIG. 5: Damped Learning. The GFP signal shows that the system responds to the non-conditioned signal  $X$  and the conditioned signal  $Y$  for a period of time. The parameter values are  $\gamma_{LacI} = 10^{-1}$  and  $\gamma_{\lambda} = 10^{-2}$ ; the other parameters are fixed to the same used in the previous figures.

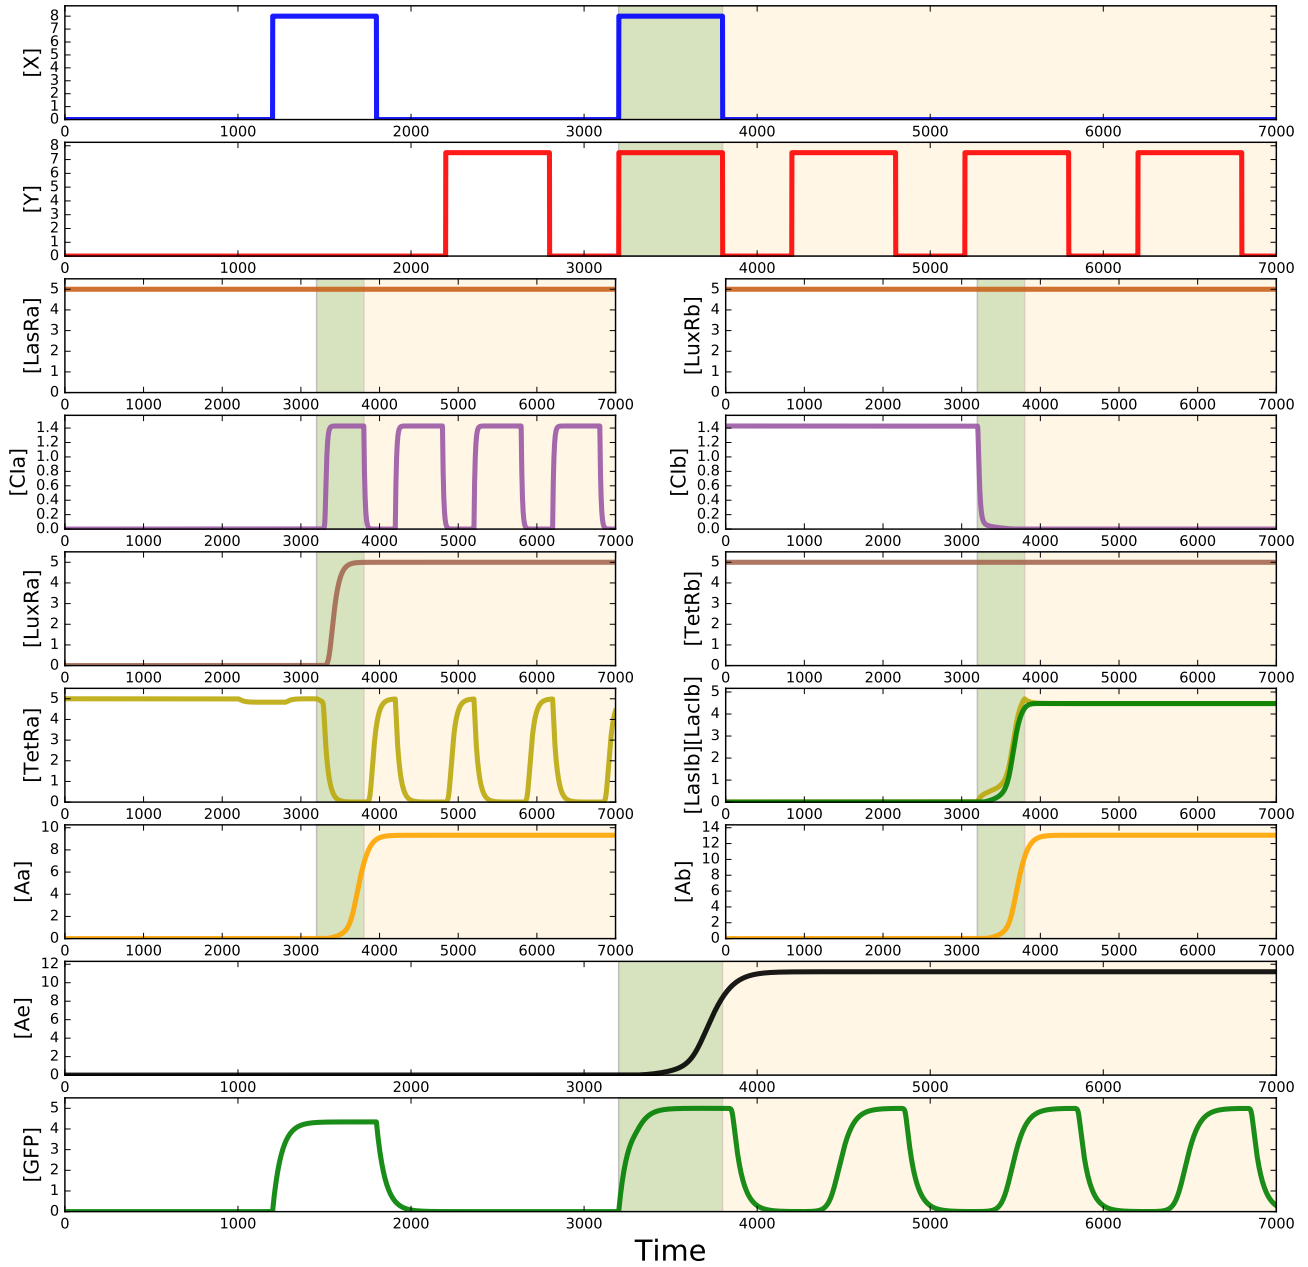

FIG. 6: Associative Learning. The output signal ( $GFP$ ) shows that after a conditioning process (simultaneous stimulation with  $X$  and  $Y$ ) the systems is capable to responds to both signals. The parameter values are  $\gamma_{LacI} = 10^{-2}$  and  $\gamma_{\lambda} = 10^{-1}$ ; the other parameters are fixed to the same used in the previous figures.

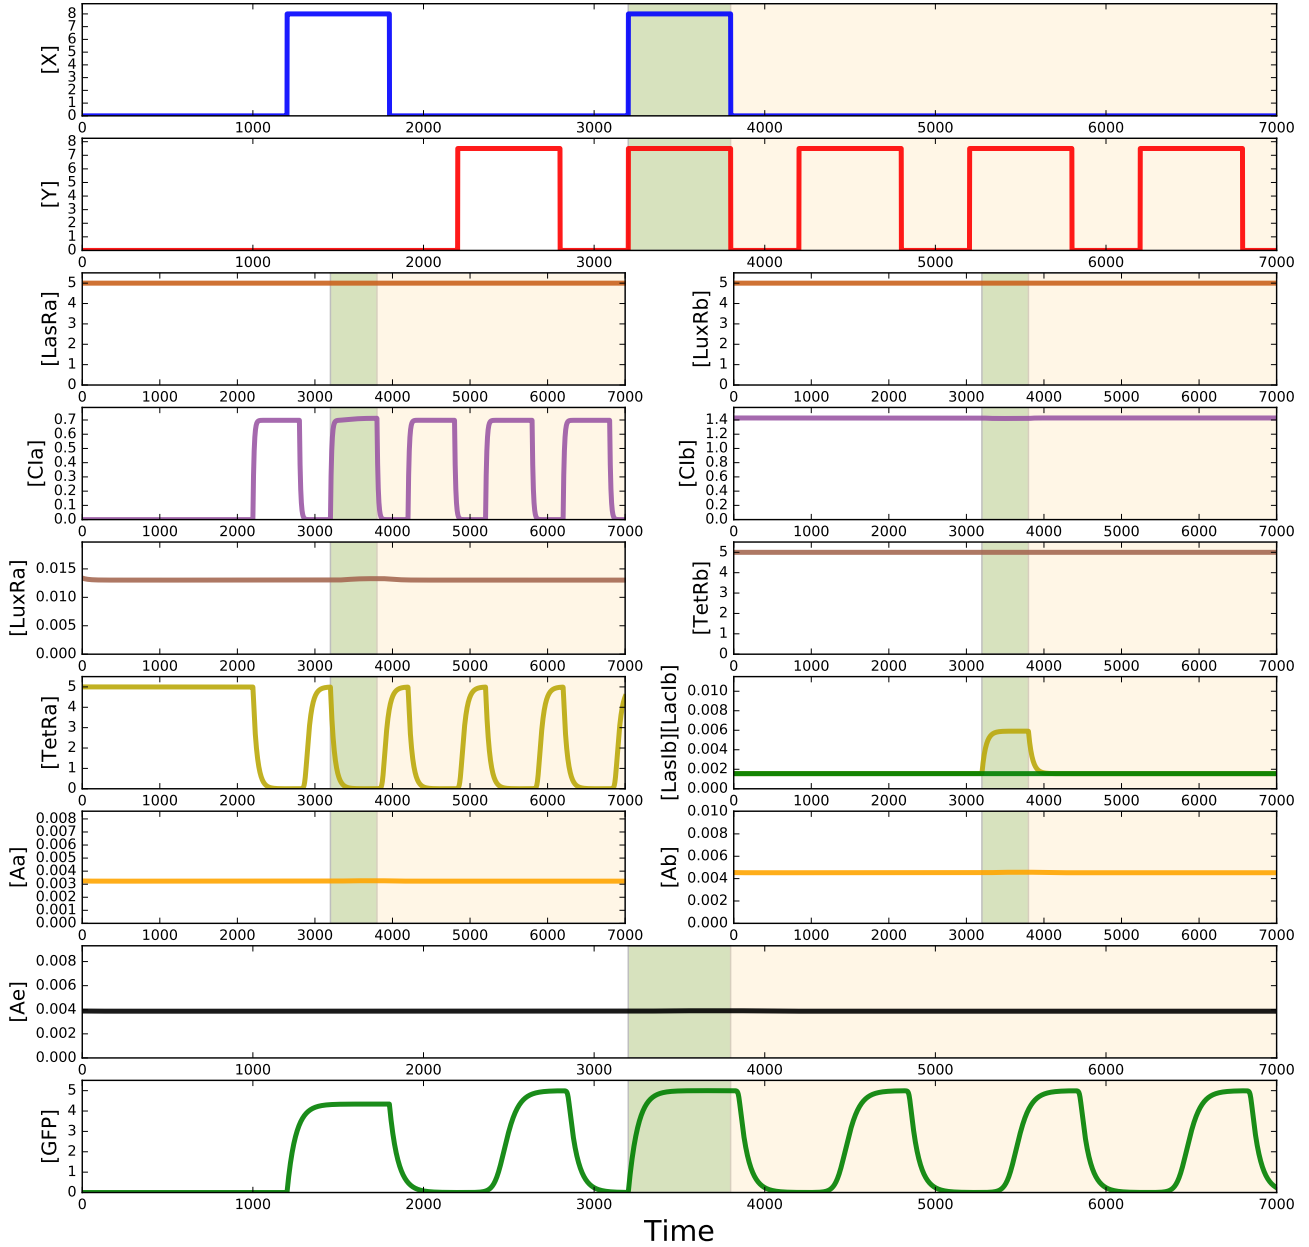

FIG. 7: Non learning responding system. The system of two cells is able to respond to both stimuli even before they are conditioned. The parameter values are  $\gamma_{LacI} = 10^{-4}$  and  $\gamma_{\lambda} = 10^0$ ; the other parameters are fixed to the same used in the previous figures.



#### 4. MODEL DESCRIPTION OF ASSOCIATIVE LEARNING (POSITIVE FEEDBACK LOOP)

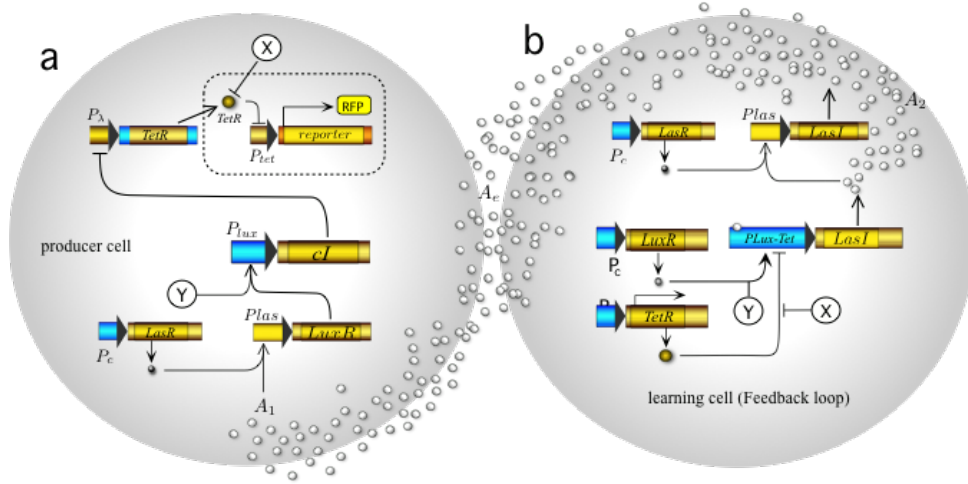

FIG. 8: Complete diagram of the Associative Learning motif using positive feedback loop.

For the design of a learning cell using a positive feedback loop we have considered the following different set of equations.

There are three genes are expressed constitutively to be receptors of the three different signals ( $X$ ,  $Y$  and the inner signalling molecule  $A$ ), they are modelled by linear equations:

$$\frac{d[LuxR]}{dt} = \gamma_{LuxR} - \delta_{LuxR}[LuxR] \quad (1)$$

$$\frac{d[TetR]}{dt} = \gamma_{TetR} - \delta_{TetR}[TetR] \quad (2)$$

$$\frac{d[LasR]}{dt} = \gamma_{LasR} - \delta_{LasR}[LasR] \quad (3)$$

The inducer protein *LasI* is produced in two different constructs. First, an induced production by the simultaneous stimulation with  $X$  and  $Y$ . And secondly, the production due to the the binding of the effector molecule  $A$  and their receptor *LasR*; this construct is the positive feedback loop.

$$\frac{d[LasI]}{dt} = \gamma_{\lambda}\Gamma_2 + \gamma_{\lambda}\Gamma_3\Gamma_1 - \delta_{LasI}[LasI] \quad (4)$$

## 5. MODEL DESCRIPTION OF DAMPED LEARNING ALTERNATIVES

### First design

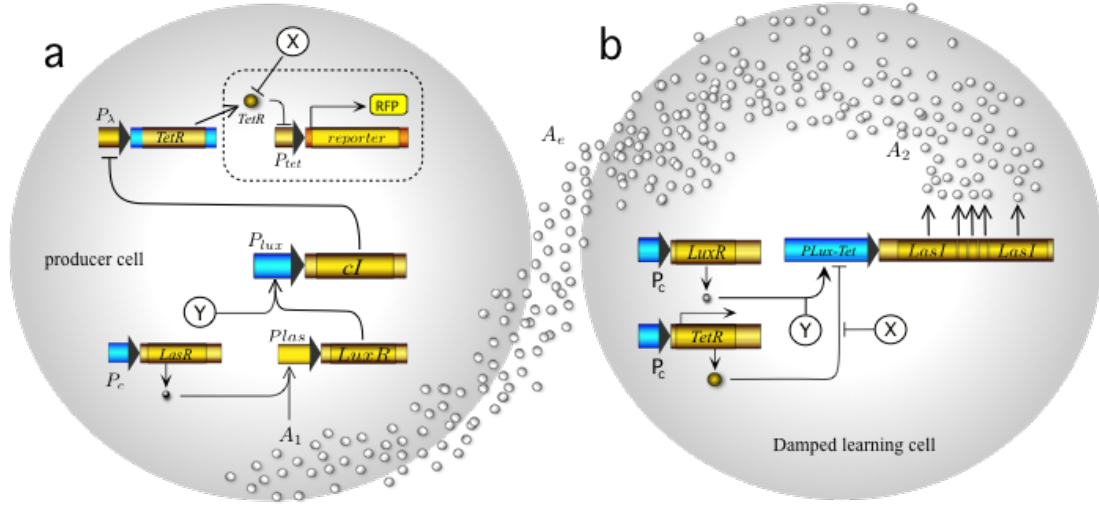

FIG. 9: Complete diagram of the Damped Learning motif.

Here two genes are expressed constitutively thus involving linear equations:

$$\frac{d[LuxR]}{dt} = \gamma_{LuxR} - \delta_{LuxR}[LuxR] \quad (5)$$

$$\frac{d[TetR]}{dt} = \gamma_{TetR} - \delta_{TetR}[TetR] \quad (6)$$

which their gene products will be the receptors of  $X$  and  $Y$  within the cell

$$\frac{d[LasI]}{dt} = \#_{LasI}\Gamma_3\Gamma_1 - \delta_{LasI}[LasI] \quad (7)$$

## Second design

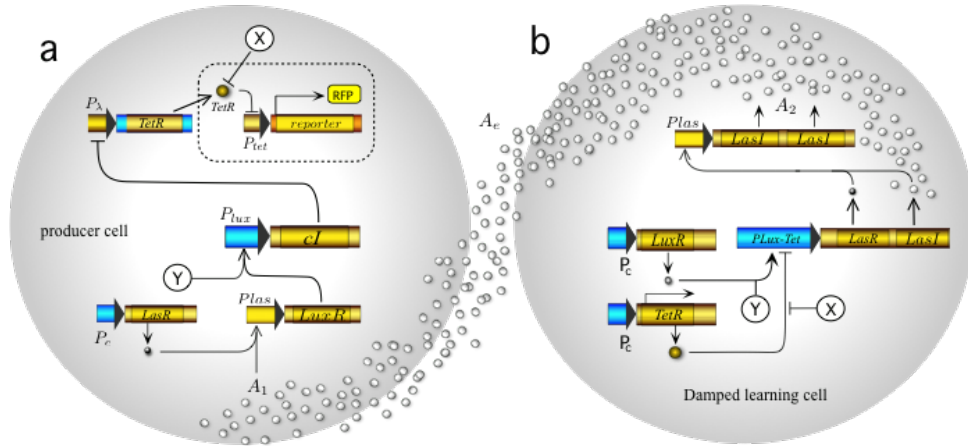

FIG. 10: Complete diagram of the Damped Learning motif.

Here two genes are expressed constitutively thus involving linear equations:

$$\frac{d[LuxR]}{dt} = \gamma_{LuxR} - \delta_{LuxR}[LuxR] \quad (8)$$

$$\frac{d[TetR]}{dt} = \gamma_{TetR} - \delta_{TetR}[TetR] \quad (9)$$

which their gene products will be the receptors of  $X$  and  $Y$  within the cell

$$\frac{d[LasR]}{dt} = \gamma_{LasR}\Gamma_3\Gamma_1 - \delta_{LasR}[LasR] \quad (10)$$

$$\frac{d[LasI]}{dt} = \#_{LasI}\Gamma_2 + \gamma_{LasI}\Gamma_3\Gamma_1 - \delta_{LasI}[LasI] \quad (11)$$
